# Supplementary material for: The SKP1-Like Gene Family of Arabidopsis Exhibits a High Degree of Differential Gene Expression and Gene Product Interaction during Development
Source: PLoS One. 2012 Nov 30;7(11):e50984. doi: 10.1371/journal.pone.0050984 (PMC3511428; doi:10.1371/journal.pone.0050984)
Supplement: Table S5 — Normalized qRT-PCR values. (XLSX) [file pone.0050984.s012.xlsx]

## Sheet: Sheet1
Table S5. Normalized qRT-PCR values
	ASK1	ASK2	ASK3	ASK4	ASK5	ASK7	ASK8	ASK9	ASK10	ASK11/ASK12	ASK13	ASK14	ASK15	ASK16	ASK17	ASK18	ASK19	ASK20	ASK21	TIR1	CUL1
MNE*˟ Leaf	0.624239	0.406658	0.000246831	0.0188987	5.11953e-08	1.9405e-05	1.10857e-06	1.45341e-06	5.84334e-06	0.00012418	5.43108e-06	7.98141e-09		3.15005e-05	3.96868e-06	0.0107467	2.70626e-05	0.073589	0.043356	0.0231764	0.11398
MNE* Stem	0.695069	0.343313	0.000111699	0.0394365	3.73479e-08	0.000768807	1.17003e-05	0.000155168	2.92158e-05	0.00203981	5.53503e-06	3.38015e-10			5.07445e-06	0.00639612	5.64973e-06	0.0783891	0.0397624	0.0167285	0.16887
MNE* Flower-S15	0.797092	0.450865	0.0308714	0.0567799	1.84937e-06	0.0432163	0.00247922	0.00424773	0.000535019	0.00234758	6.42706e-05	4.1643e-07	6.33571e-12	0.0474533	0.0172334	0.0291142	0.000395332	0.0319806	0.0213686	0.00685534	0.209629
MNE* Silique	0.376999	0.163979	8.22392e-05	0.0260563	1.56389e-08	7.05708e-05	1.95918e-06	4.34562e-06	0.000116663	0.000690667	6.82231e-06	8.01585e-09	6.04546e-11	2.55328e-05	3.47705e-05	0.0060885	3.34126e-06	0.031411	0.0210116	0.0111538	0.139376
MNE* Root	0.274179	0.163899	7.83111e-05	0.0145158	5.30453e-08	3.33262e-05	2.88262e-06	1.84593e-06	9.39016e-06	0.000270129	7.89113e-06	1.87973e-08		3.23189e-05	7.27705e-06	0.0067889	1.39182e-05	0.0412569	0.0188489	0.00781941	0.0745318
MNE* Seedling	0.716225	0.379255	0.000661266	0.0789631	1.44325e-05	5.91978e-05	9.74075e-07	4.97119e-06	4.28239e-06	0.00404655	8.6317e-05	6.39013e-06		0.00013299	9.81042e-06	0.0440068	0.000772116	0.0810112	0.0475951	0.0241942	0.205166
MNE* Flower-S9	1.01978	0.489924	0.00149763	0.0594715	1.84682e-06	0.00139257	3.80063e-05	0.000194398	2.59574e-05	0.00332437	4.39563e-05	1.18484e-07		0.000337771	0.000469667	0.0344803	0.000193566	0.0876577	0.040149	0.0192808	0.31612
SE˟ Leaf	0.0506494	0.0100796	0.000106726	0.000962014	1.4703e-08	9.67531e-06	5.00661e-07	5.87086e-07	2.15863e-06	1.04094e-05	5.43108e-06	4.4343e-09		5.67662e-07	1.81131e-07	6.68697e-05	5.68443e-06	0.00665279	0.00207868	0.00122549	0.00219953
SE˟ Stem	0.0182575	0.00755015	1.09066e-05	0.00193444	4.07499e-09	3.5826e-05	1.1155e-06	1.62434e-05	1.32572e-06	0.000118443	5.53503e-06	8.62435e-12			5.12181e-07	7.57361e-05	2.71885e-06	0.00105519	0.00122016	0.000654554	0.00639789
SE˟ Flower-S15	0.00888039	0.00814957	0.00243919	0.0032935	9.5413e-09	0.00184792	2.39603e-05	0.000417959	3.20413e-05	2.45096e-05	6.42706e-05	4.28278e-08	2.63308e-12	0.000818782	0.000552727	0.000614951	2.76507e-05	5.16591e-05	0.000807375	0.000557381	0.0126186
SE˟ Silique	0.00828983	0.00609265	1.40255e-06	0.00158523	2.87838e-09	1.5132e-05	4.59257e-07	3.24728e-07	8.95129e-06	3.30835e-05	6.82231e-06	1.24273e-09	1.16658e-11	4.48479e-06	1.11853e-06	0.000117359	1.15807e-06	0.00112397	0.000482644	0.000691371	0.0132676
SE˟ Root	0.00497967	0.0058146	3.41226e-05	0.00106098	1.16674e-08	2.57957e-06	6.55831e-07	6.21277e-08	2.00256e-07	1.87331e-05	7.89113e-06	1.32984e-09		1.68485e-06	5.40423e-07	0.000292746	4.39246e-06	0.00171382	0.000389932	0.000490695	0.00315098
SE˟ Seedling	0.0113786	0.00352052	4.70304e-06	0.00497008	1.51438e-06	3.47168e-06	2.88382e-07	3.96322e-07	3.27259e-07	0.000143014	8.6317e-05	4.03842e-07		2.45961e-06	1.81323e-07	0.00149519	5.72922e-05	0.00385126	0.000558059	0.00117455	0.00470128
SE˟ Flower-S9	0.05664	0.00775059	0.000177579	0.0016501	1.19788e-07	0.000134029	8.14909e-06	8.44077e-06	1.852e-07	0.000153591	4.39563e-05	6.43023e-09		4.54682e-05	3.99392e-05	0.0010122	1.02769e-05	0.00274507	0.00348047	0.0011607	0.0283197
*Mean Normalized Expression
˟ Standard Error of Mean Normalized expression
